# Supplementary material for: ISL1 and AQP5 complement each other to enhance gastric cancer cell stemness by regulating CD44 expression
Source: PubMed Central journal article supplement — Transl Cancer Res. 2024 Oct 28;13(10):5484–96. doi: 10.21037/tcr-24-248 (PMC11543036; doi:10.21037/tcr-24-248), 2024-10-28
Supplement: tcr-13-10-5484-dss.pdf [file tcr-13-10-5484-dss.pdf]

## Data Sharing Statement

|                     |                                                                                                                                                     |                                                                                                         |
|---------------------|-----------------------------------------------------------------------------------------------------------------------------------------------------|---------------------------------------------------------------------------------------------------------|
| <b>Article Info</b> | <a href="https://dx.doi.org/10.21037/tcr-24-248">https://dx.doi.org/10.21037/tcr-24-248</a>                                                         |                                                                                                         |
| <b>Item</b>         | <b>Question</b>                                                                                                                                     | <b>Authors' Response<br/>(place "-" if not applicable)</b>                                              |
| 1                   | Would you like to share data collected for your study to others?                                                                                    | Yes                                                                                                     |
| 2                   | If not, would you like to share the reason for your decision?                                                                                       | -                                                                                                       |
| 3                   | What data in particular will be shared?                                                                                                             | We agree to share the original patient data/mouse data/cell culture/RNA sequencing data in the article. |
| 4                   | Any other documents will be shared? Such as study protocol, statistical analysis plan, informed consent form, clinical study report, analytic code. | -                                                                                                       |
| 5                   | When will data availability begin?                                                                                                                  | 2026.01.01                                                                                              |
| 6                   | When will data availability end?                                                                                                                    | No limit                                                                                                |
| 7                   | To whom will you share the data?                                                                                                                    | Everyone involved                                                                                       |
| 8                   | For what type of analysis or purpose?                                                                                                               | Research on gastric cancer                                                                              |
| 9                   | How or where can the data/documents be obtained?                                                                                                    | Contact the corresponding author                                                                        |
| 10                  | Any other restrictions?                                                                                                                             | -                                                                                                       |
