# Supplementary material for: ISL1 and AQP5 complement each other to enhance gastric cancer cell stemness by regulating CD44 expression
Source: PubMed Central journal article supplement — Transl Cancer Res. 2024 Oct 28;13(10):5484–96. doi: 10.21037/tcr-24-248 (PMC11543036; doi:10.21037/tcr-24-248), 2024-10-28
Supplement: tcr-13-10-5484-supplementary.pdf [file tcr-13-10-5484-supplementary.pdf]

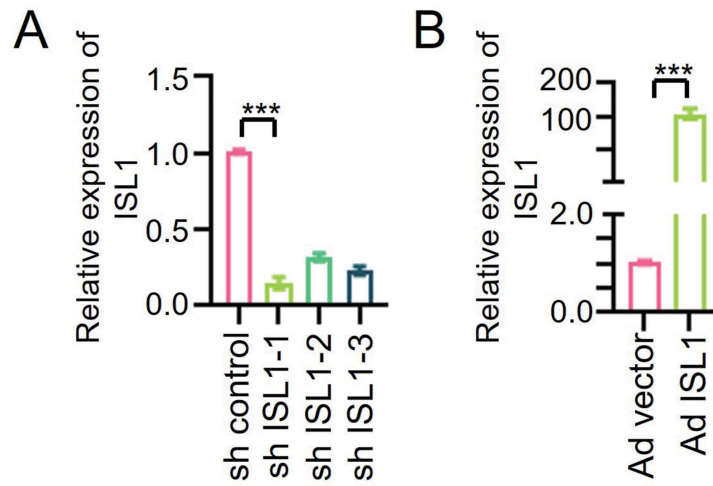

**Figure S1** qRT-PCR was used to detect the expression of ISL1 in different cells (biological repeat 3 times). \*\*\*,  $P < 0.001$ . qRT-PCR, quantitative reverse transcription-polymerase chain reaction; ISL1, insulin gene enhancer binding protein-1.

**Table S1** Gastric cancer patient information

| Study participant number | Age (years) | Sex    |
|--------------------------|-------------|--------|
| 1                        | 69          | Male   |
| 2                        | 49          | Female |
| 3                        | 69          | Male   |
| 4                        | 60          | Male   |
| 5                        | 52          | Female |
| 6                        | 67          | Male   |
| 7                        | 70          | Female |
| 8                        | 77          | Male   |
| 9                        | 69          | Male   |
| 10                       | 52          | Male   |
| 11                       | 44          | Female |
| 12                       | 74          | Male   |

**Table S2** Sequences of real-time PCR primers

| Gene               | Primer sequence               |
|--------------------|-------------------------------|
| Human- <i>lgr5</i> | Forward: CATCAGCTATGTGCCCCCAA |
|                    | Reverse: TGTGGAGCCCATCAAAGCAT |
| Human- <i>sox2</i> | Forward: ACACCAATCCCATCCACACT |
|                    | Reverse: GCAAACCTTCTGCAAAGCTC |
| Human- <i>cd44</i> | Forward: CACACCCTCCCCTCATTAC  |
|                    | Reverse: TGGATGGCTGGTATGAGCTG |
| Human- <i>oct4</i> | Forward: TTGAGGCTCTGCAGCTTAG  |
|                    | Reverse: GCCGGTTACAGAACCACAC  |
| Human- <i>isl1</i> | Forward: CTTTCAGCATTGGCAACCCC |
|                    | Reverse: ACACAGCGGAAACACTCGAT |
| Human- <i>ck18</i> | Forward: CTGTCCTTTCTCTCTCCCG  |
|                    | Reverse: CGTTCAGGCTTTGCATGGTC |
| Human- <i>muc1</i> | Forward: TCTCAGACGTCAGCGTGAGT |
|                    | Reverse: CTCGCTCATAGGATGGTAGG |

PCR, polymerase chain reaction.
